# Supplementary figures and images for: Associations of Nutrition-Related, Physical, and Social Factors and Their Combinations with Sarcopenia in Community-Dwelling Older Adults: Kashiwa Cohort Study
Source: MDPI journal article supplement (doi:10.3390/nu14173544), 2022-08-27

**Supplementary Materials:** Figure S1: Flow diagram of the study.

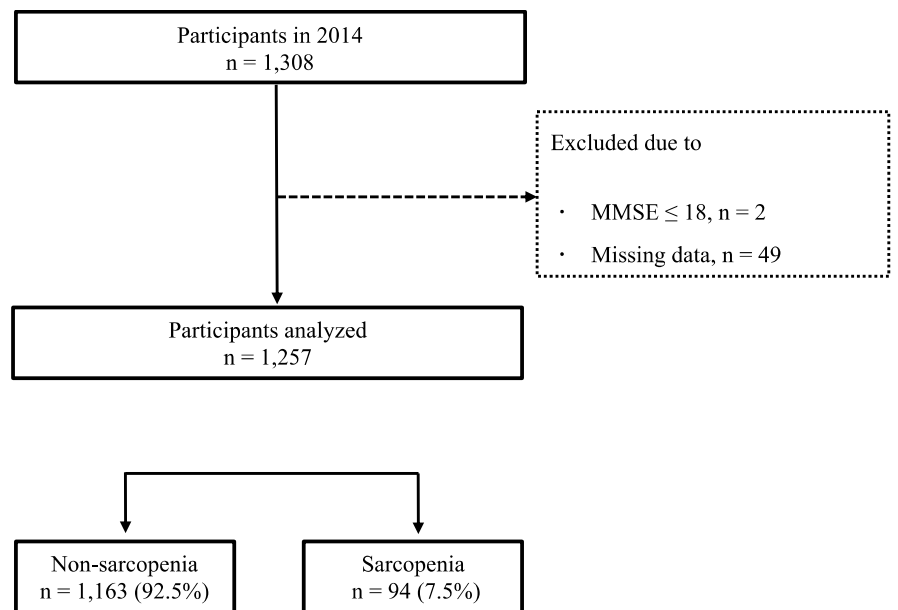

Supplement: s1 [file s1]
